# Supplementary material for: Intratumoral in vivo staging of breast cancer by multi-tracer PET and advanced analysis
Source: PubMed Central journal article supplement (PMC8948294; doi:10.1038/s41523-022-00398-x), 2022-03-24
Supplement: 41523_2022_398_MOESM2_ESM.pdf [file 41523_2022_398_MOESM2_ESM.pdf]

## Supplemental Fig. S1

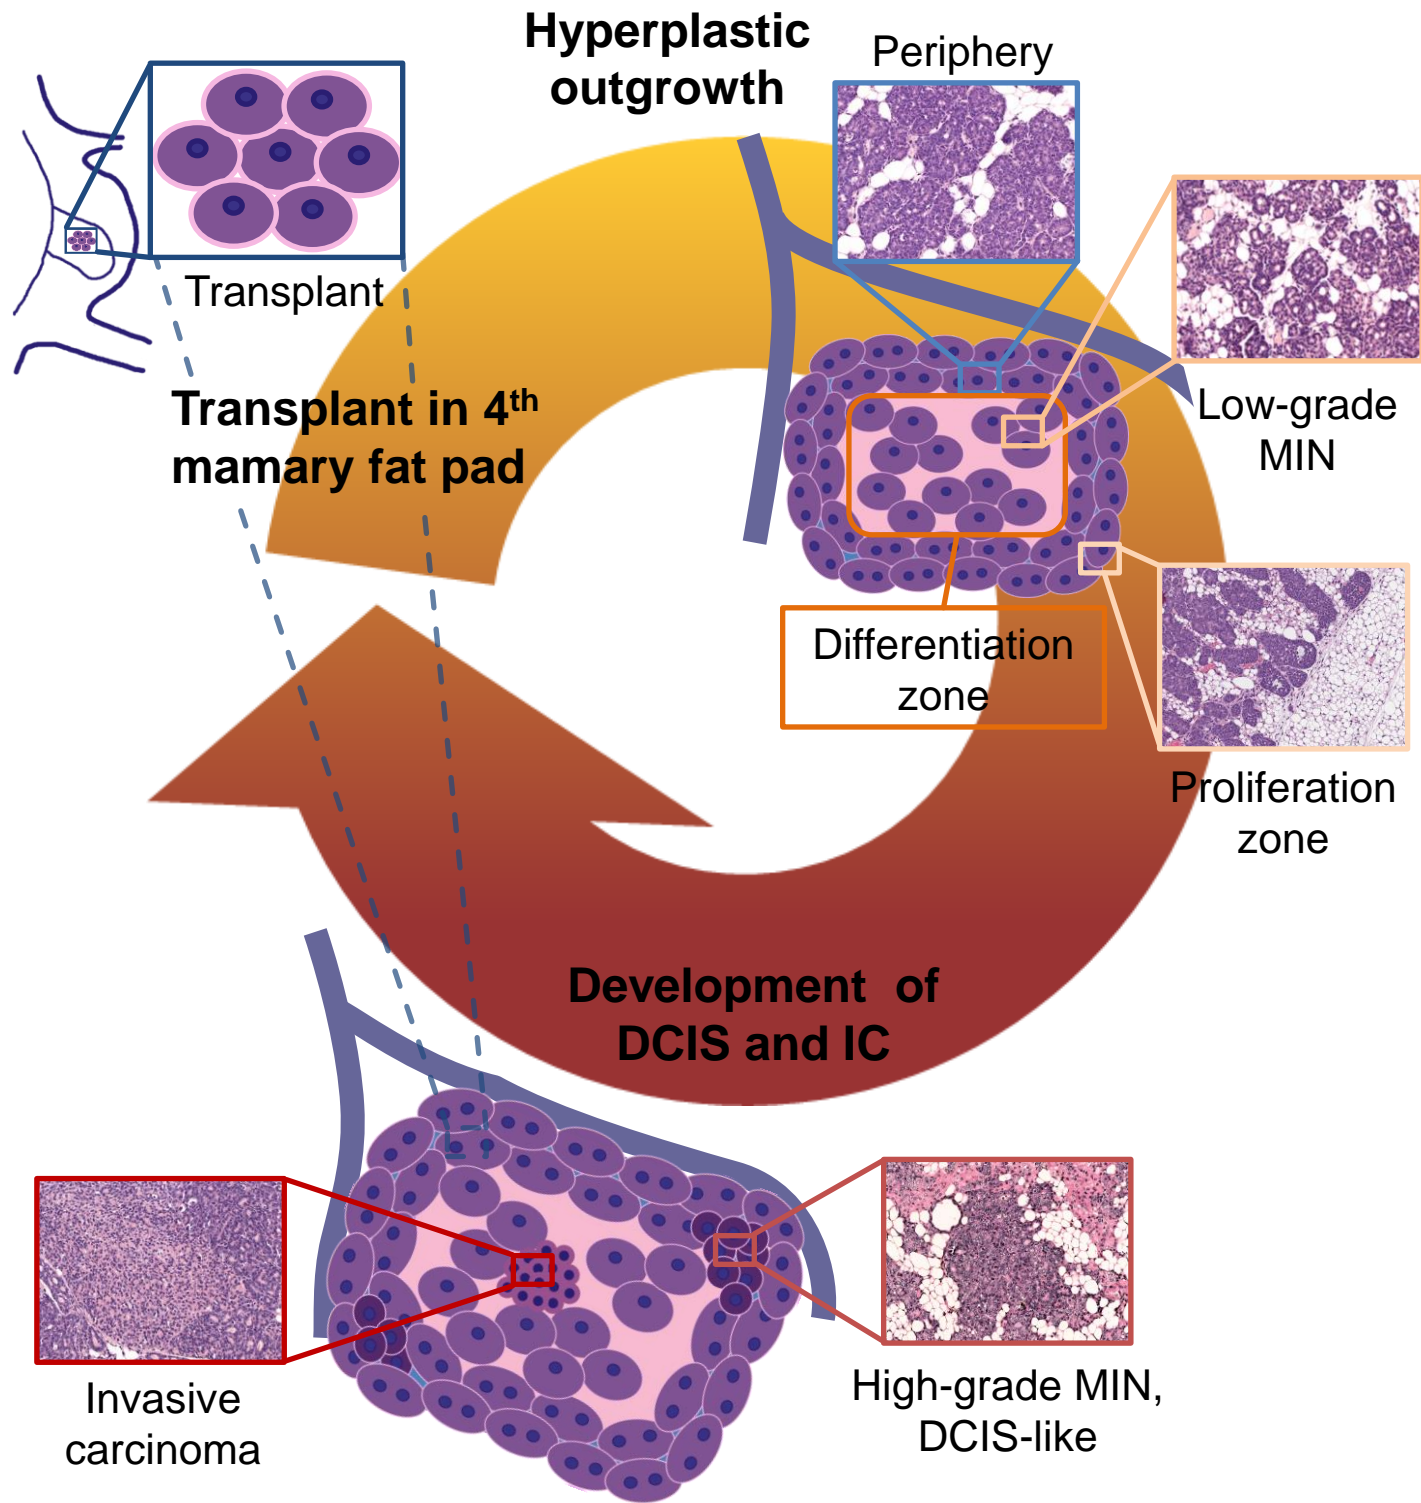

**Supplemental Figure S1 : Schematic description of the MIN-O mouse model.** A biopsy from the periphery of the MIN-O (fresh or cryopreserved), transplanted into the gland-cleared mammary fat pad #4, grows as an atypical hyperplasia within the boundaries of the mammary fat pad expanding via a terminal end bud-like peripheral proliferation zone. In the central part of the transplant, a differentiation zone develops as hyperplasia or low-grade MIN with normal spacing and contact inhibition. Over time, increasing numbers of high-grade MIN clusters may develop. Invasive carcinomas primarily arise, with time, in the central differentiation zone. Tissue from the peripheral proliferation zone serves as donor tissue for subsequent serial transplantations.

## Supplemental Fig. S2

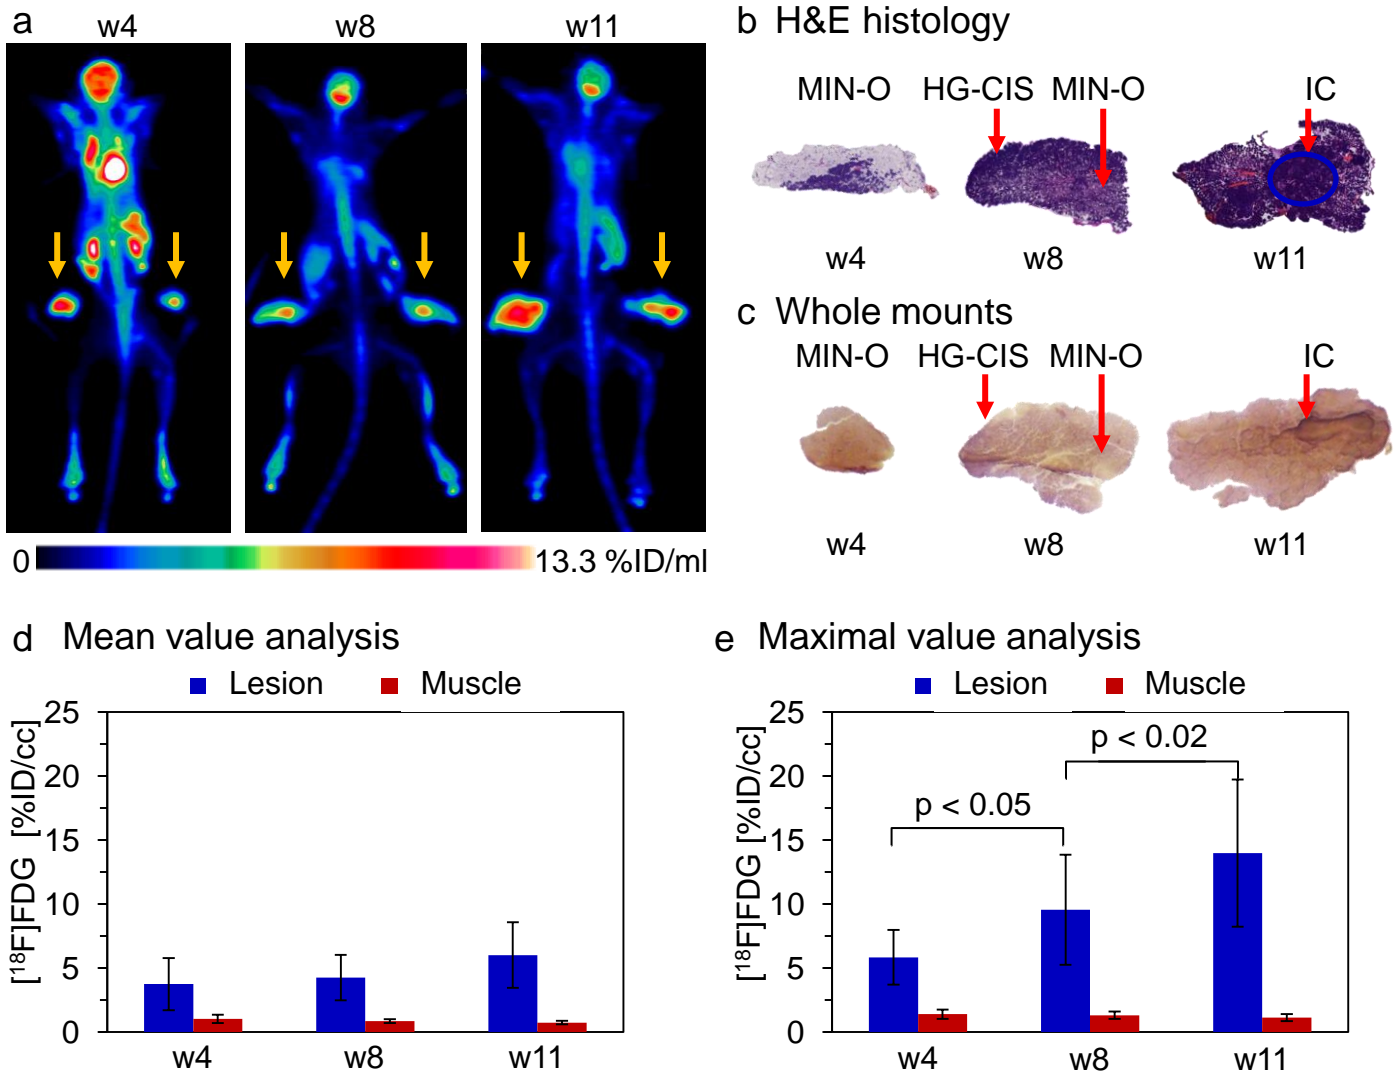

**Supplemental Figure S2: Heterogeneity of the MIN-O model:** (a) Heterogeneous *in vivo* [ $^{18}\text{F}$ ]FDG uptake within MIN-O lesions over time (yellow arrows). (b) H&E histology of the heterogeneous structure of MIN-O tissue showing the stages of MIN outgrowth, foci of higher grade DCIS-like MIN (HG-CIS), and IC over time (red arrows). (c) “Whole-mounts” of MIN-O tissue showing the stages of hyperplasia, DCIS-like MIN and IC over time (red arrows). (d) Mean value analysis (%ID/cc  $\pm$  SD) of the lesions over time showed higher [ $^{18}\text{F}$ ]FDG uptake compared to muscle uptake for all time points but no significant increase over time. (e) Maximal value analysis (%ID/cc  $\pm$  SD) further showed significantly increased [ $^{18}\text{F}$ ]FDG uptake over time. Statistical analysis was performed using Tukey-Kramer tests for multiple group comparisons. Error bars indicate the standard deviation (SD).

# Supplemental Fig. S3

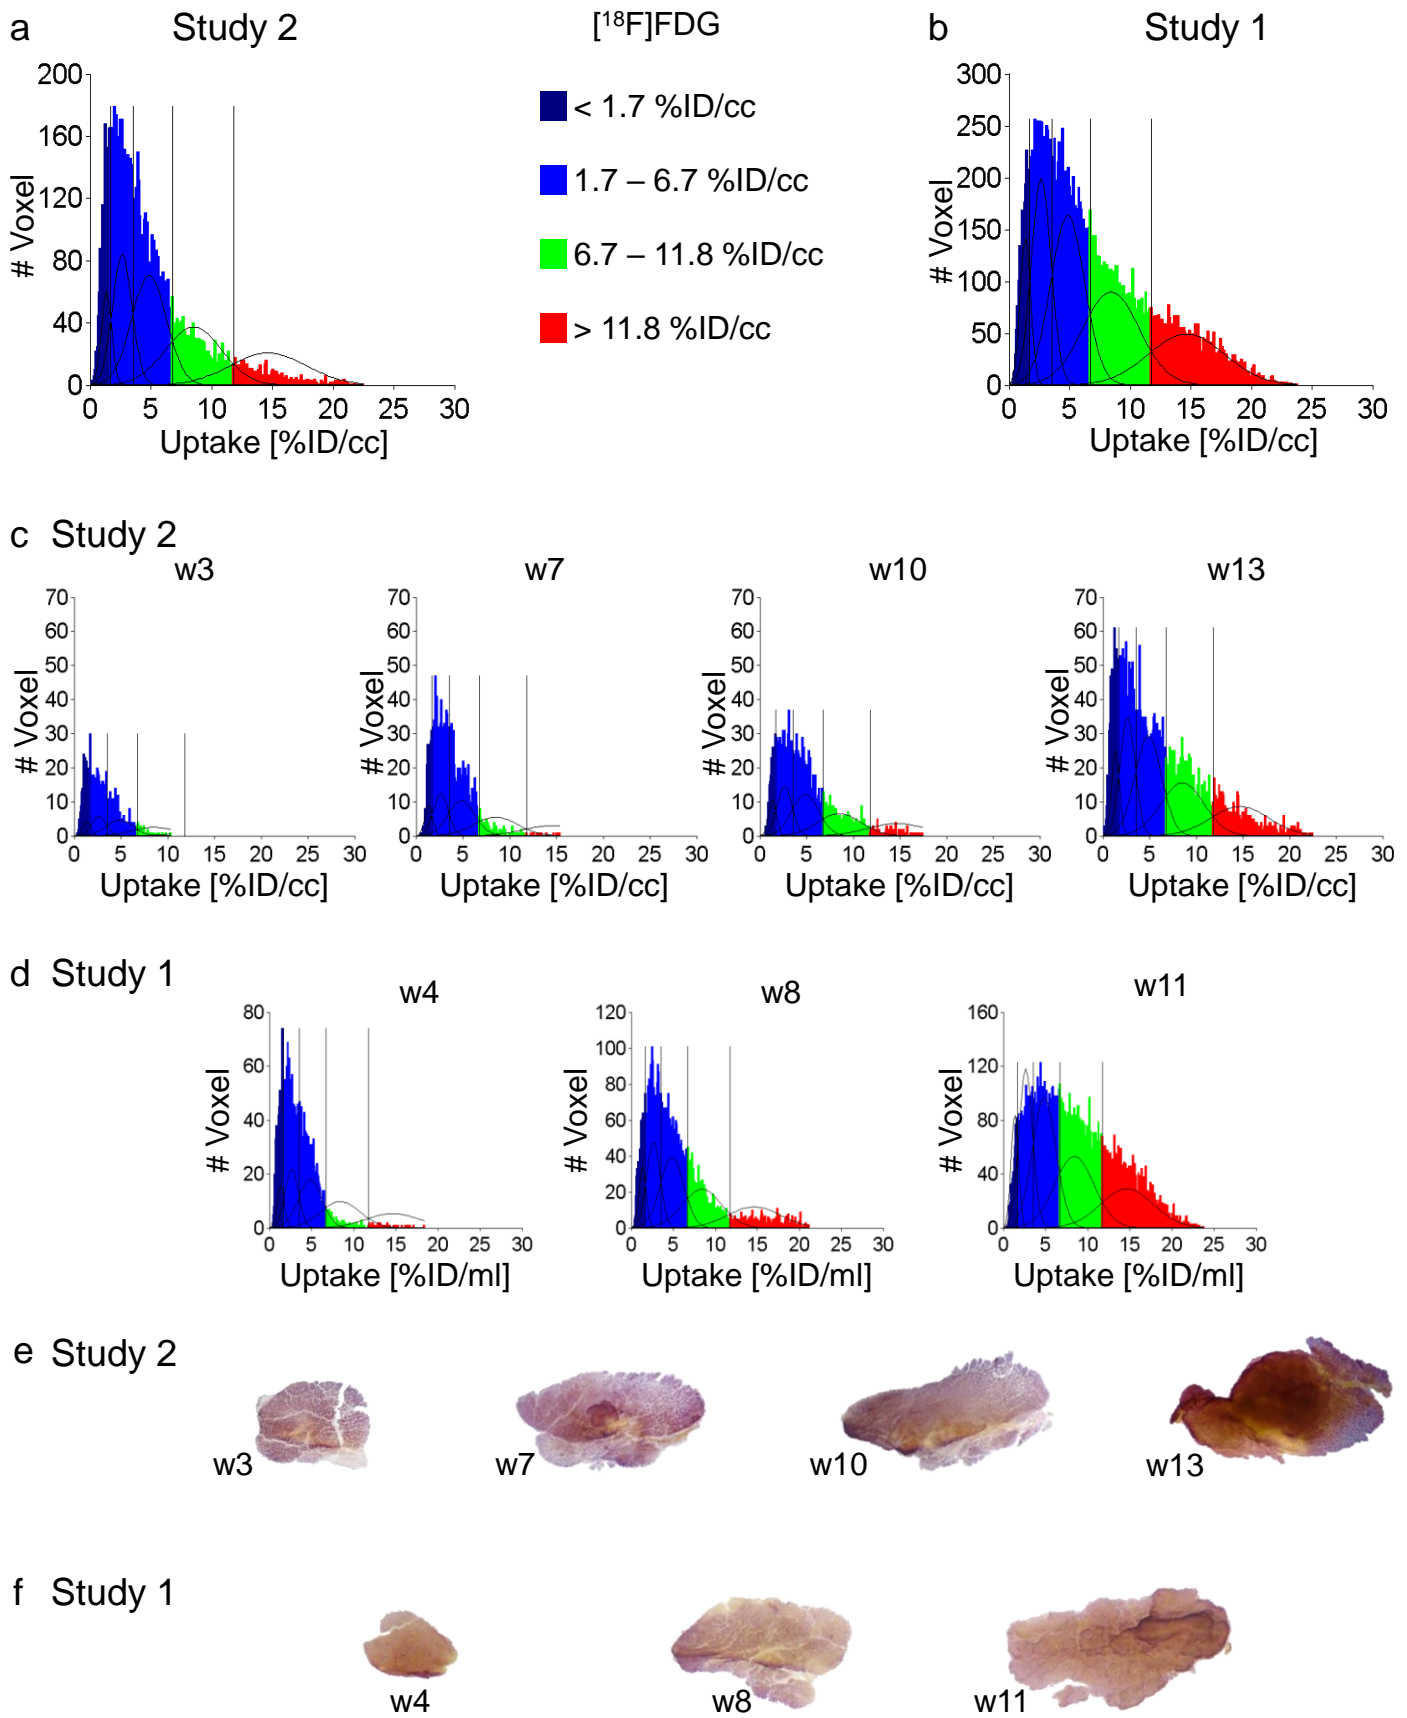

**Supplemental Figure S3: Validation of the GMM analysis of [<sup>18</sup>F]FDG in the MIN-O model:** (a) The calculated GMM model of the training data set in study 1, including the thresholds, was applied to the summed histogram of study 2 as the test data set. (b) The GMM model of study 1 compared to the results in study 2 showed higher amounts of moderate (green; 6.7 – 11.8%ID/cc) and high uptake populations (red; > 11.8%ID/cc). (c, d) GMM results were applied to the single time points in study 2 (c) and study 1 (d), showing good agreement of both studies with a slightly slower appearance and lower amounts of the moderate and high uptake populations (green and red) in study 2. (e, f) Whole-mounts of representative lesions in study 2 (e) and study 1 (f) verified the slightly slower but comparable tumor development in study 2 compared to study 1.

## Supplemental Fig. S4

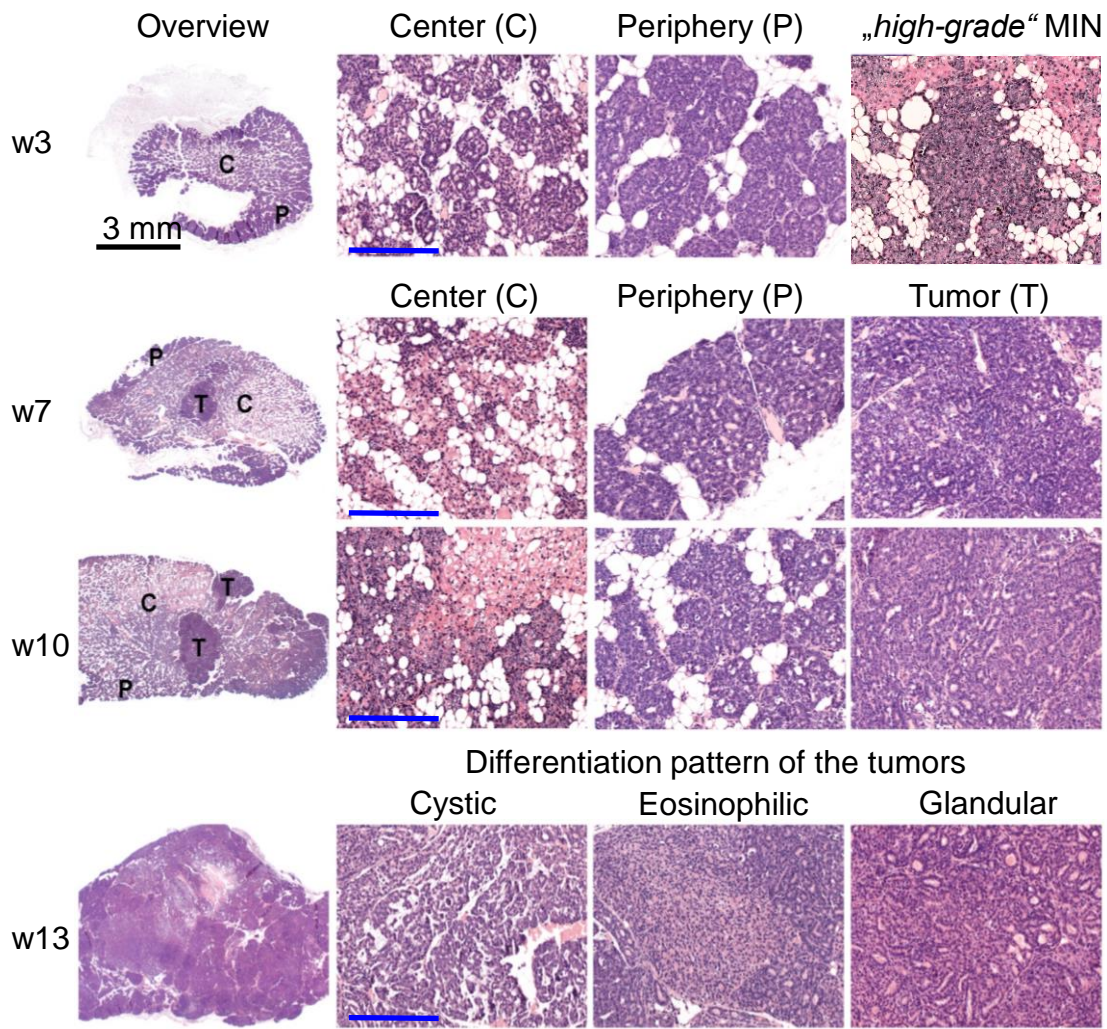

### Supplemental Figure S4: Pathological description of tumor development in the MIN-O

**model:** An overview of transplanted MIN-O tissues showing the development of lesions from hyperplastic outgrowth to IC from w3 until w13. In the center (C) of the hyperplastic lesions, low-grade MIN patterns with high differentiation were observed, whereas DCIS-like high-grade MIN regions with less differentiation were located in the periphery (P) of lesions from w3 until w10. In w7 (n = 1) and w10 (all lesions), additional solid tumor nests, arising from the center of the lesions, appeared that showed a glandular differentiation pattern. Only in w13 were large tumors observed, comprised of cystic, eosinophilic, and glandular differentiation patterns. The blue scale bar indicates 200  $\mu\text{m}$ .

## Supplemental Fig. S5

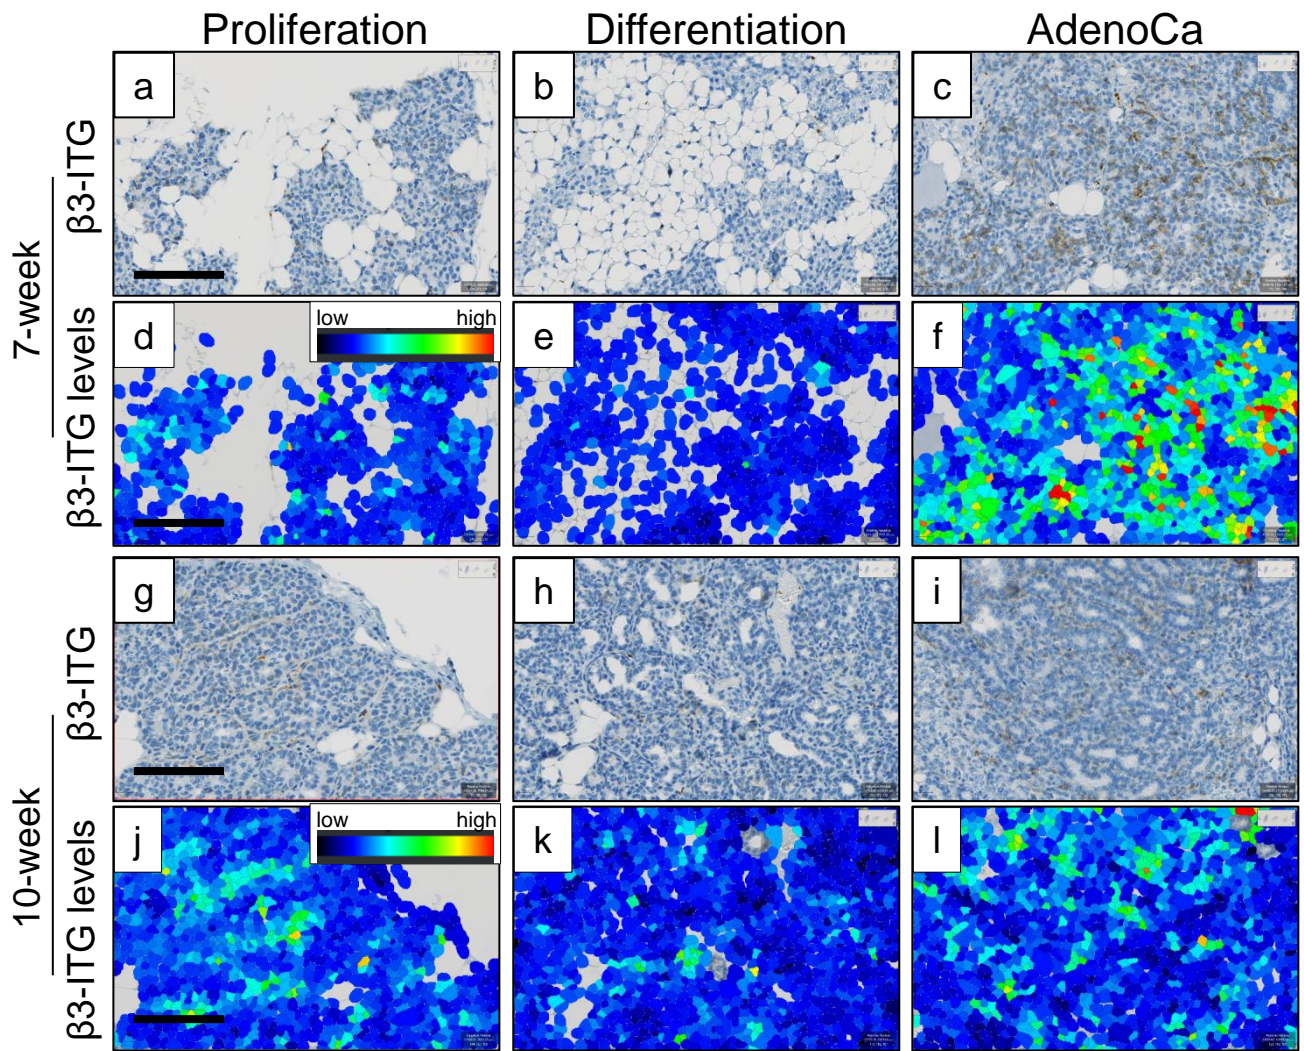

**Supplemental Figure S5:  $\beta_3$ -Integrin expression:**  $\beta_3$ -integrin stained MIN-O tissues at 7-week (a-f) and 10-week (g-l) and the levels of  $\beta_3$ -integrin (d-f, j-l) are shown. Images were analyzed at growth zone (a,d,g,j), differentiation zones (b,e,h,k) and tumor areas (indicated as AdenoCa; c,f,i,l). The color indicates the levels of  $\beta_3$ -integrin (d-f, j-l) as brighter color as higher  $\beta_3$ -integrin levels and dark color as lower  $\beta_3$ -integrin levels. The scale bar indicates 100  $\mu\text{m}$ .

## Supplemental Fig. S6

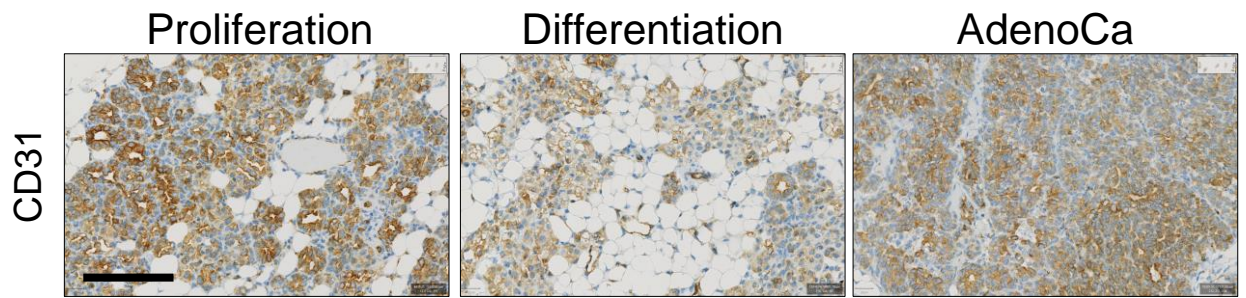

**Supplemental Figure S6: Vessel density:** Representative CD31 staining of 7-week MIN-O tissues showed a dense but heterogeneous blood vessel system within the proliferation and differentiation zones as well as in the adenocarcinomas. Positive CD31 staining in endothelial cells indicates possible vasculogenic mimicry in MIN-O tissues. The scale bar indicates 100  $\mu\text{m}$ .

**Supplemental Table 1:** Uptake of [<sup>18</sup>F]FDG in breast cancer patients.

|         | Tumor   |          | DCIS    |          |
|---------|---------|----------|---------|----------|
| Patient | SUV max | SUV mean | SUV max | SUV mean |
| 1       | 8.77    | 7.39     | 1.27    | 1.22     |
| 2       | 16.05   | 12.95    | 1.37    | 1.31     |
